# Supplementary material for: Temperature Regimes Impact Coral Assemblages along Environmental Gradients on Lagoonal Reefs in Belize
Source: PubMed Central journal article supplement (PMC5015988; doi:10.1371/journal.pone.0162098), 2016-09-08
Supplement: pone.0162098.s005.pdf [file pone.0162098.s005.pdf]

**S1 Table: Site locations**

| Site Name           | Site Type          | Latitude<br>(Degrees N) | Longitude<br>(Degrees W) | Depth | Habitat           |
|---------------------|--------------------|-------------------------|--------------------------|-------|-------------------|
| 1- Dangriga Low     | LOW <sub>TP</sub>  | 17.078                  | 88.01285                 | 3-5 m | Back reef         |
| 2- Dangriga Mod     | Mod <sub>TP</sub>  | 16.99597                | 88.08416                 | 3-5 m | Patch reef        |
| 3- Dangriga High    | High <sub>TP</sub> | 16.79491                | 88.27699                 | 3-5 m | Nearshore         |
| 4- Placencia Low    | LOW <sub>TP</sub>  | 16.45816                | 88.01295                 | 3-5 m | Back reef         |
| 5- Placencia Mod    | Mod <sub>TP</sub>  | 16.49995                | 88.16527                 | 3-5 m | Patch reef        |
| 6- Placencia High   | High <sub>TP</sub> | 16.4654                 | 88.31315                 | 3-5 m | Nearshore<br>reef |
| 7- Sapodilla Low    | LOW <sub>TP</sub>  | 16.15729                | 88.25073                 | 3-5 m | Back reef         |
| 8- Sapodilla Mod    | Mod <sub>TP</sub>  | 16.13013                | 88.33234                 | 3-5 m | Patch reef        |
| 9- Sapodilla High   | High <sub>TP</sub> | 16.2245                 | 88.62943                 | 3-5 m | Nearshore         |
| 10- Belize City Low | LOW <sub>TP</sub>  | 17.54239                | 88.06509                 | 3-5 m | Back reef         |
| 11- Belize City Mod | Mod <sub>TP</sub>  | 17.64363                | 88.0264                  | 3-5 m | Patch reef        |
| 12- Caulker Low     | LOW <sub>TP</sub>  | 17.79846                | 88.00196                 | 3-5 m | Back reef         |
| 13- Caulker Mod     | Mod <sub>TP</sub>  | 17.82413                | 88.02581                 | 3-5 m | Patch reef        |

S1 table: Summary of survey sites, site types, latitude, and longitude.
