# Supplementary material for: Temperature Regimes Impact Coral Assemblages along Environmental Gradients on Lagoonal Reefs in Belize
Source: PubMed Central journal article supplement (PMC5015988; doi:10.1371/journal.pone.0162098), 2016-09-08
Supplement: pone.0162098.s006.pdf [file pone.0162098.s006.pdf]

**S3 Table:  $p$ -values and  $R^2$  from Linear Regression of Physical Parameters vs. NMDS1 and NMDS2**

|                                                       | NMDS1               |        | NMDS2               |        |
|-------------------------------------------------------|---------------------|--------|---------------------|--------|
|                                                       | $p$ -value of slope | $R^2$  | $p$ -value of slope | $R^2$  |
| Avg Annual Max Temp                                   | <b>0.02</b>         | 0.0327 | <b>&lt;0.0001</b>   | 0.4154 |
| Avg Annual Range                                      | <b>0.0001</b>       | 0.0926 | <b>&lt;0.0001</b>   | 0.4361 |
| Avg Annual Days Above Bleaching Threshold             | <b>0.3</b>          | 0.0063 | <b>&lt;0.0001</b>   | 0.5644 |
| Avg Annual Consecutive Days Above Bleaching Threshold | <b>&lt;0.0001</b>   | 0.1026 | <b>&lt;0.0001</b>   | 0.6039 |
| <i>Chl a</i>                                          | 0.5                 | 0.0035 | <b>0.009</b>        | 0.0434 |

S3 Table: Summary of  $p$ - and  $R^2$  values for temperature and nutrient parameters vs. NMDS1 and NMDS 2. Significant  $p$ -values are in bold.
