# Supplementary material for: Temperature Regimes Impact Coral Assemblages along Environmental Gradients on Lagoonal Reefs in Belize
Source: PubMed Central journal article supplement (PMC5015988; doi:10.1371/journal.pone.0162098), 2016-09-08
Supplement: pone.0162098.s007.pdf [file pone.0162098.s007.pdf]

**S2 Table:  $p$ -values and  $R^2$  for Linear Regression of Physical Parameters vs. NMDS1 by Site Type**

|                                                       | low <sub>TP</sub>   |        | mod <sub>TP</sub>   |        | high <sub>TP</sub>  |        |
|-------------------------------------------------------|---------------------|--------|---------------------|--------|---------------------|--------|
|                                                       | $p$ -value of slope | $R^2$  | $p$ -value of slope | $R^2$  | $p$ -value of slope | $R^2$  |
| Avg Annual Max Temp                                   | <b>0.01</b>         | 0.1119 | <b>&lt;0.0001</b>   | 0.6268 | <b>&lt;0.0001</b>   | 0.8627 |
| Avg Annual Range                                      | 0.442               | 0.0104 | <b>&lt;0.0001</b>   | 0.4389 | <b>&lt;0.0001</b>   | 0.9514 |
| Avg Annual Days Above Bleaching Threshold             | <b>&lt;0.0001</b>   | 0.9514 | <b>0.04</b>         | 0.9514 | <b>&lt;0.0001</b>   | 0.9435 |
| Avg Annual Consecutive Days Above Bleaching Threshold | <b>0.05</b>         | .06612 | <b>&lt;0.0001</b>   | 0.6664 | <b>&lt;0.0001</b>   | 0.8946 |
| <i>Chl a</i>                                          | 0.6                 | 0.0058 | 0.6                 | 0.0046 | <b>0.0006</b>       | 0.2878 |

Table S9: Summary of  $p$ - and  $R^2$  values for physical parameters vs. NMDS1 by site type. Significant  $p$ -values are in bold.
