# Supplementary material for: Temperature Regimes Impact Coral Assemblages along Environmental Gradients on Lagoonal Reefs in Belize
Source: PubMed Central journal article supplement (PMC5015988; doi:10.1371/journal.pone.0162098), 2016-09-08
Supplement: pone.0162098.s008.pdf [file pone.0162098.s008.pdf]

| <b>City/Town</b> | <b>Census Population 2010</b> | <b>Estimated Mid-year Population 2010</b> | <b>Estimated Mid-year Population 2011</b> | <b>Estimated Mid-year Population 2012</b> | <b>Estimated Mid-year Population 2013</b> | <b>Estimated Mid-year Population 2014</b> | <b>Estimated Mid-year Population 2015</b> |
|------------------|-------------------------------|-------------------------------------------|-------------------------------------------|-------------------------------------------|-------------------------------------------|-------------------------------------------|-------------------------------------------|
| Orange Walk      | 13,708                        | 13,707                                    | 13,704                                    | 13,700                                    | 13,696                                    | 13,692                                    | 13,687                                    |
| San Pedro        | 11,767                        | 11,884                                    | 12,749                                    | 13,637                                    | 14,549                                    | 15,484                                    | 16,444                                    |
| Belize City      | 57,169                        | 57,264                                    | 57,966                                    | 58,686                                    | 59,426                                    | 60,184                                    | 60,963                                    |
| Belmopan         | 13,939                        | 14,077                                    | 15,098                                    | 16,146                                    | 17,222                                    | 18,326                                    | 19,458                                    |
| Dangriga         | 9,593                         | 9,606                                     | 9,701                                     | 9,799                                     | 9,899                                     | 10,002                                    | 10,108                                    |
| Punta Gorda      | 5,351                         | 5,365                                     | 5,468                                     | 5,574                                     | 5,683                                     | 5,795                                     | 5,910                                     |
| Country Total    | 322,453                       | 323,598                                   | 332,084                                   | 340,792                                   | 349,728                                   | 358,899                                   | 368,310                                   |

Source: Statistical Institute of Belize (<http://www.sib.org.bz/statistics/population>)
